# Supplementary material for: Systematic development of a theory-informed multifaceted behavioural intervention to increase physical activity of adults with type 2 diabetes in routine primary care: Movement as Medicine for Type 2 Diabetes
Source: PubMed Central journal article supplement (PMC4950706; doi:10.1186/s13012-016-0459-6), 2016-07-19

**Your name**  
\_\_\_\_\_

**Where you live**  
\_\_\_\_\_

**Instructions**

Write the names or numbers of the following people and groups on the rings of the Circle of Influence. The closer they are to YOU, the MORE IMPORTANT they are to your successful diabetes management. Leave out any people or groups you have not encountered. Add in any people that we've missed out.

**People and groups involved in diabetes management:**

- Your GP 1
- GP Practice Nurse 2
- Phlebotomist  
*Blood samples* 3
- Optometrist  
*Eye screening* 4
- Podiatrist  
*Foot care* 5
- Dietician 6
- Pharmacist 7
- DESMOND Programme 8
- Endocrinologist  
*Hormone specialist* 9
- Diabetes UK Support Group 10
- Psychologist 11
- Diabetes Specialist Nurse 12
- Diabetes Research Doctor 13
- Consultant Diabetologist 14
- Physiotherapist 15
- Exercise Practitioner 16

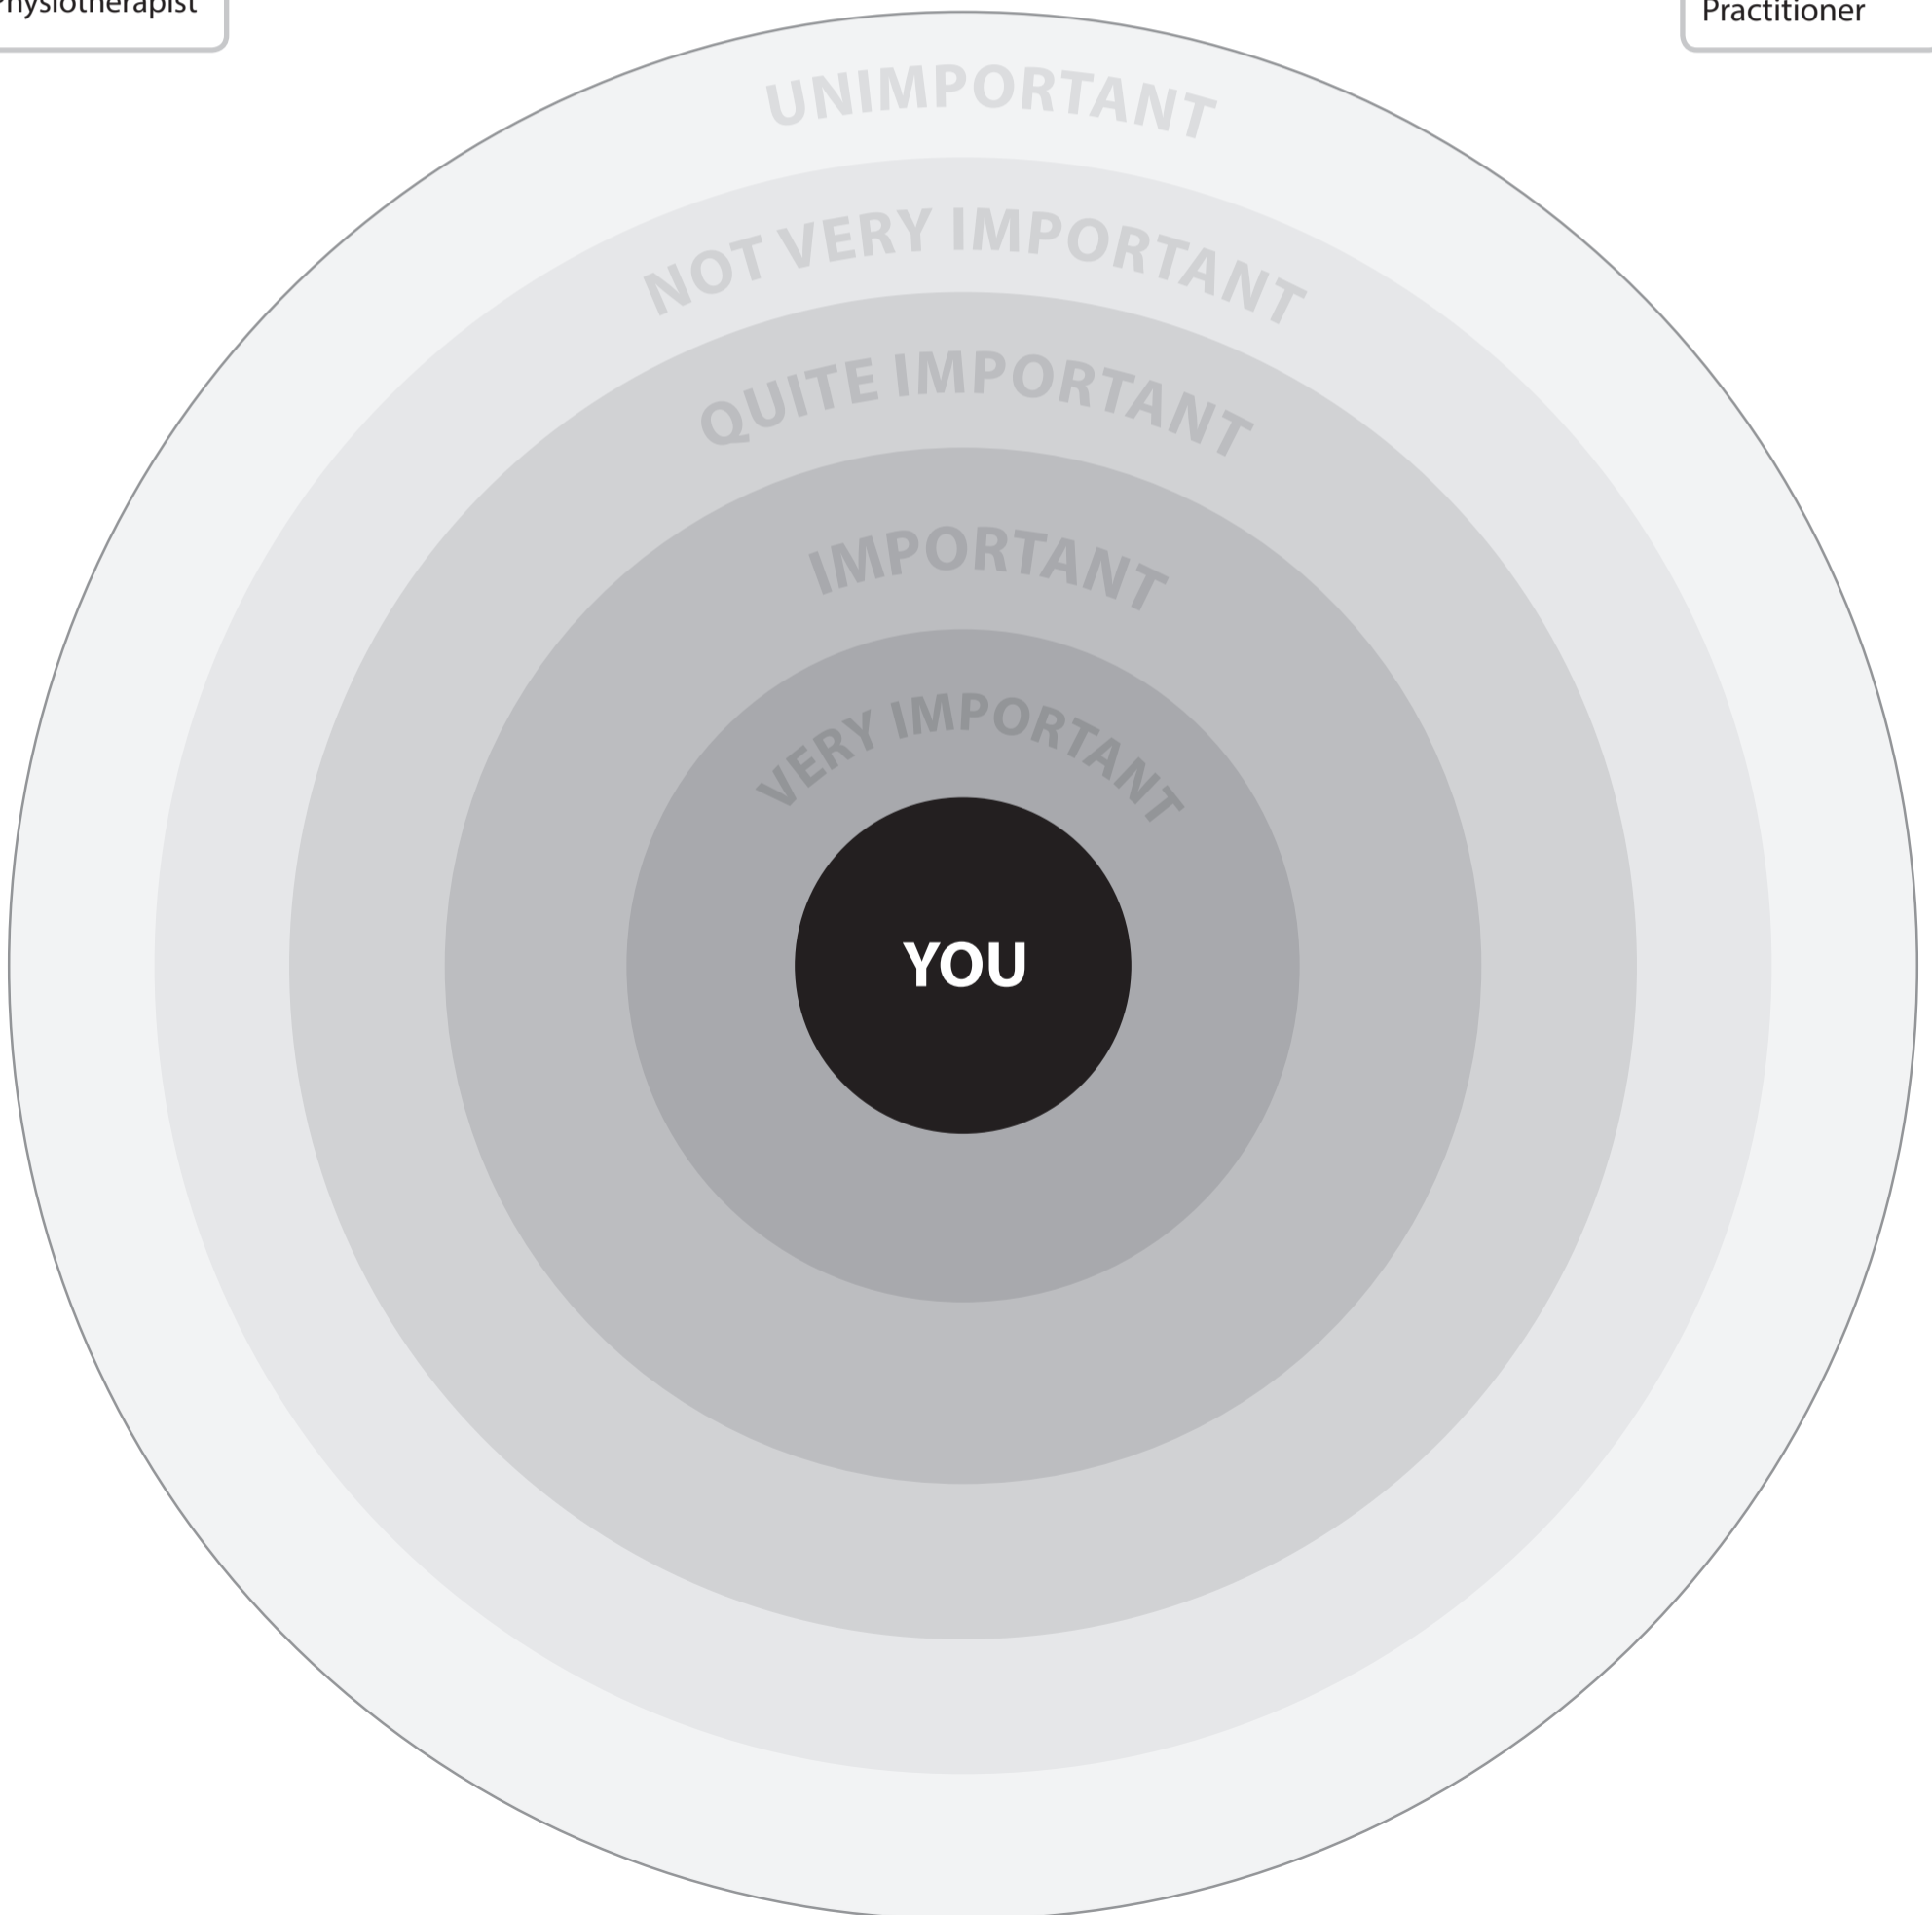

Supplement: 13012_2016_459_MOESM1_ESM.pdf [file 13012_2016_459_MOESM1_ESM.pdf]
