# Supplementary material for: Systematic development of a theory-informed multifaceted behavioural intervention to increase physical activity of adults with type 2 diabetes in routine primary care: Movement as Medicine for Type 2 Diabetes
Source: PubMed Central journal article supplement (PMC4950706; doi:10.1186/s13012-016-0459-6), 2016-07-19

**Instructions**

Write the things that make a GREAT Health Professional onto the silhouette below.

*WHAT DO THEY LOOK LIKE?*

*HOW OLD ARE THEY?*

*WHAT ARE THEY WEARING?*

*HOW DO THEY TREAT YOU?*

*WHAT DO THEY SAY?*

*HOW DO THEY GET RESULTS?*

*DO THEY TELL YOU WHAT  
YOU WANT TO HEAR?*

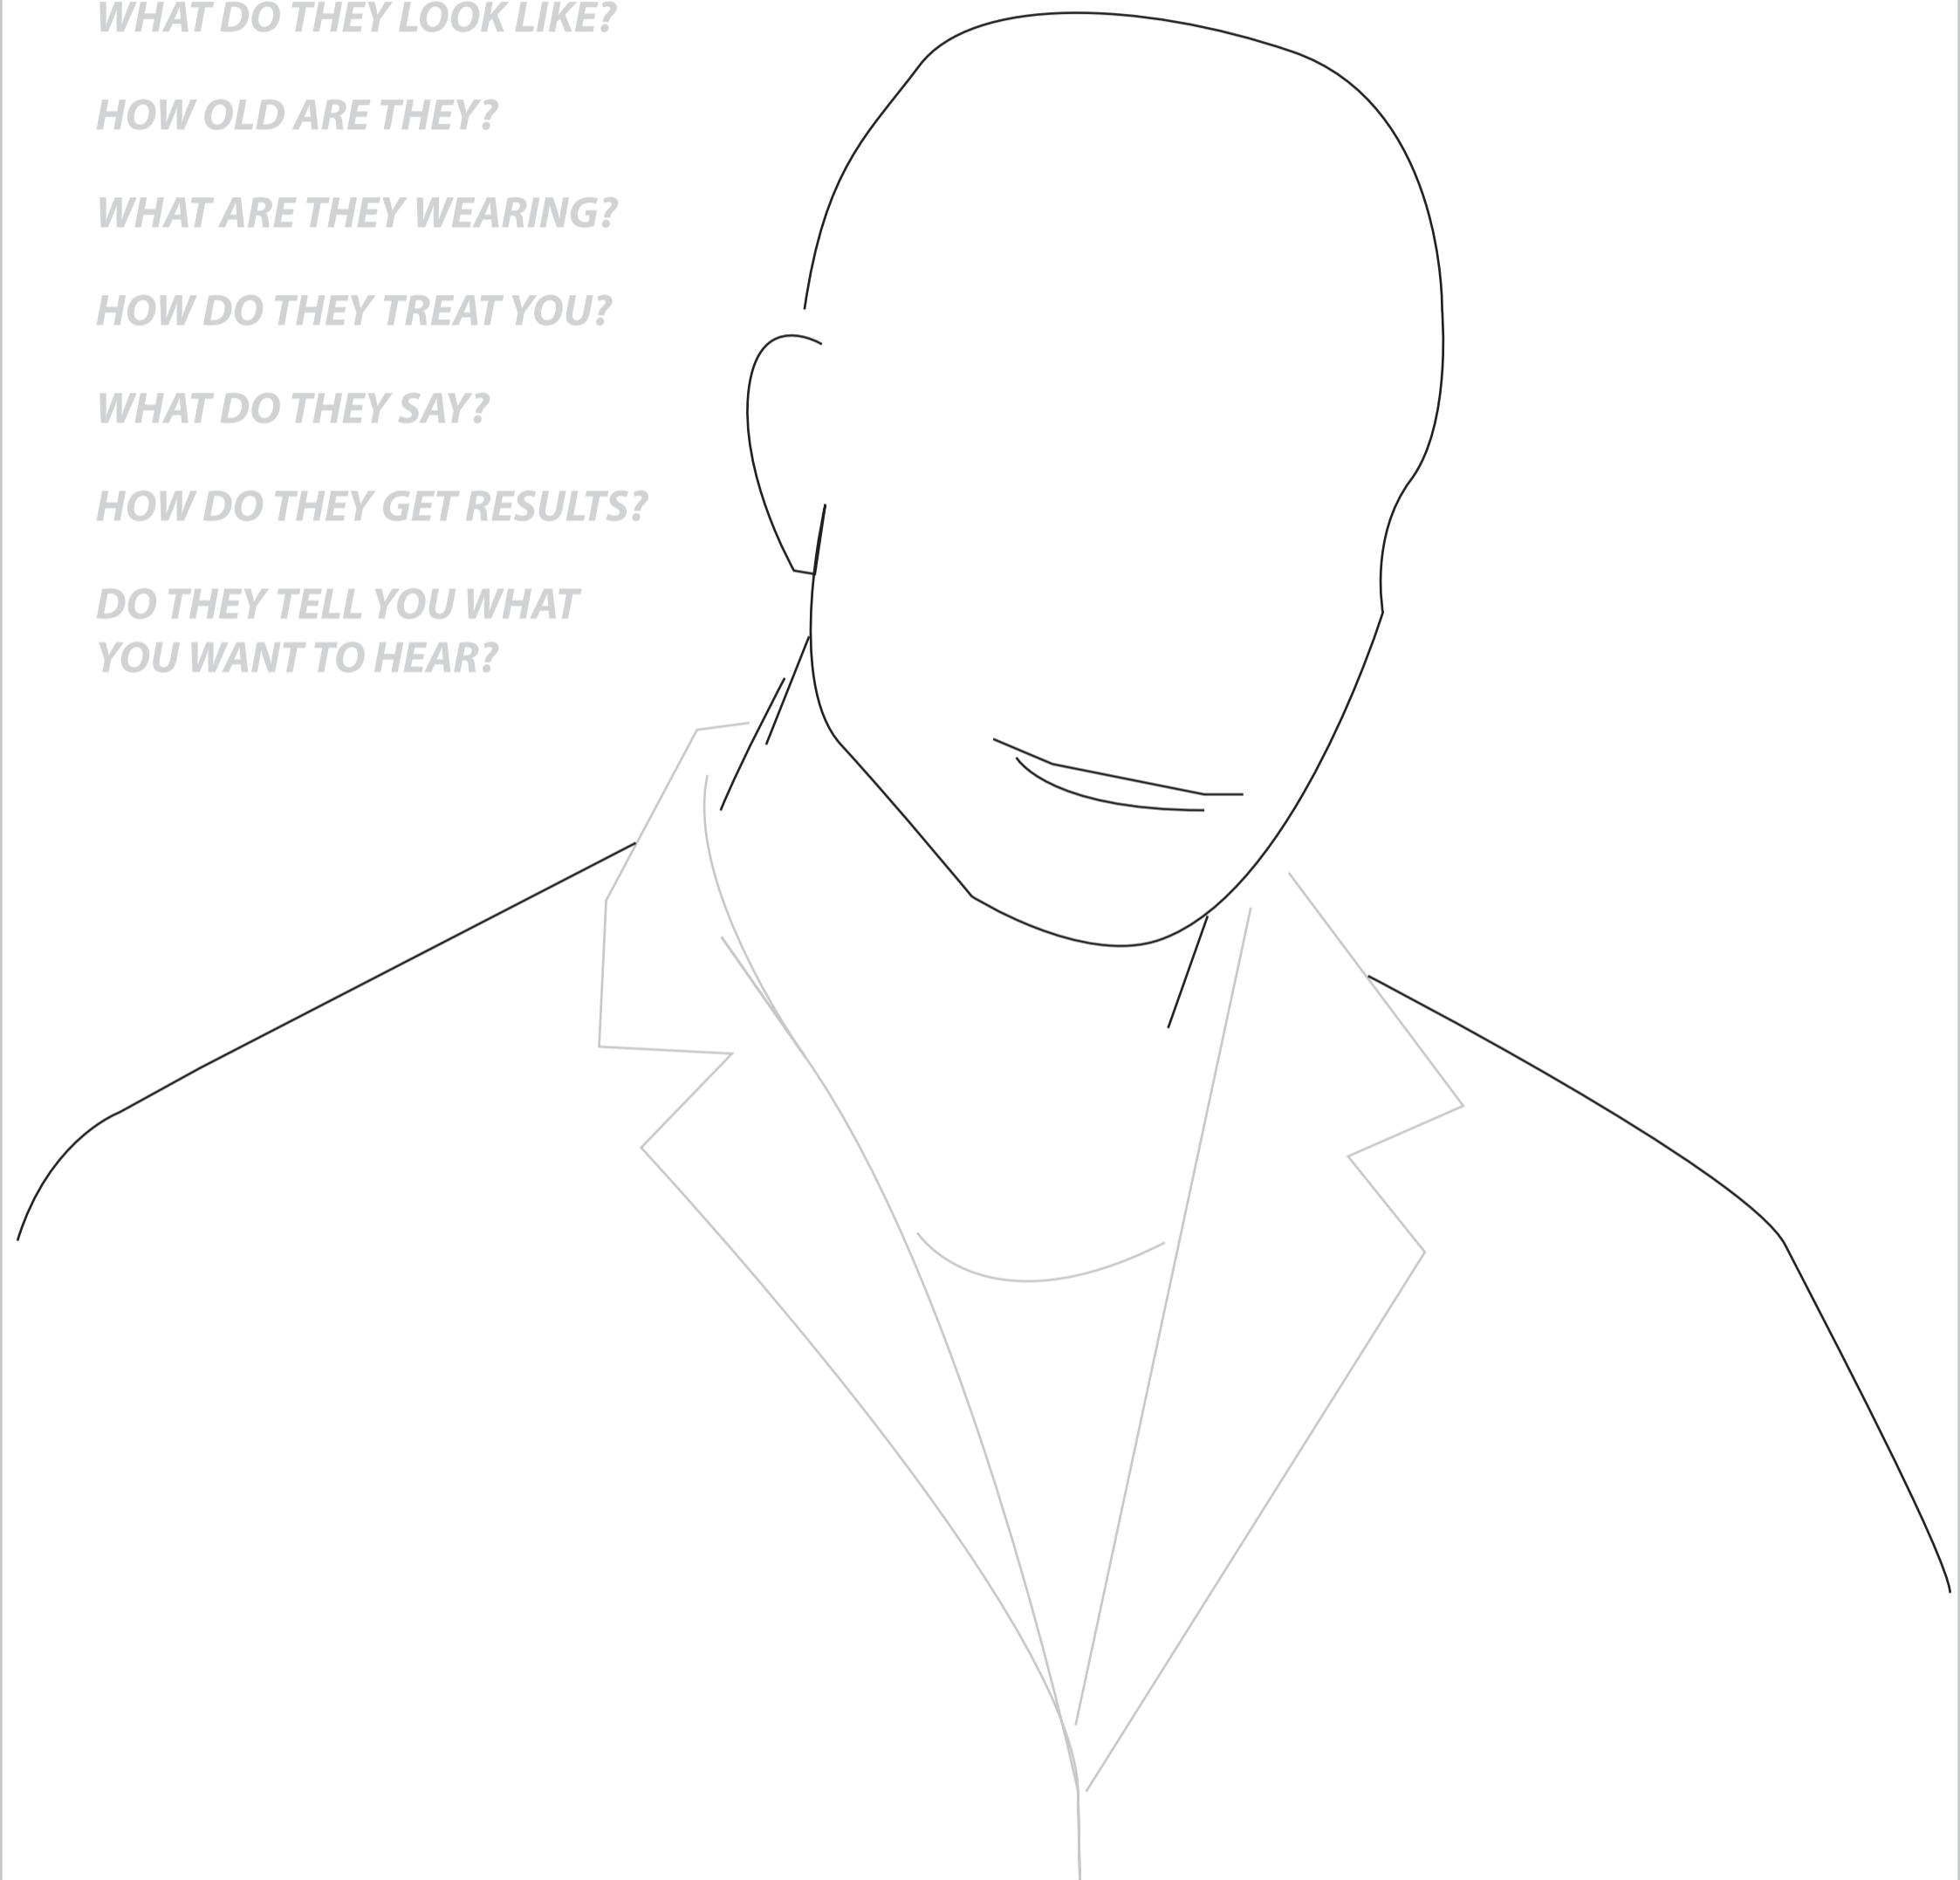

Supplement: 13012_2016_459_MOESM3_ESM.pdf [file 13012_2016_459_MOESM3_ESM.pdf]
